# Supplementary material for: Fine Mapping and Identification of a Candidate Gene of Downy Mildew Resistance, RPF2, in Spinach (Spinacia oleracea L.)
Source: MDPI journal article supplement (doi:10.3390/ijms232314872), 2022-11-28
Supplement: s1 [file s1]

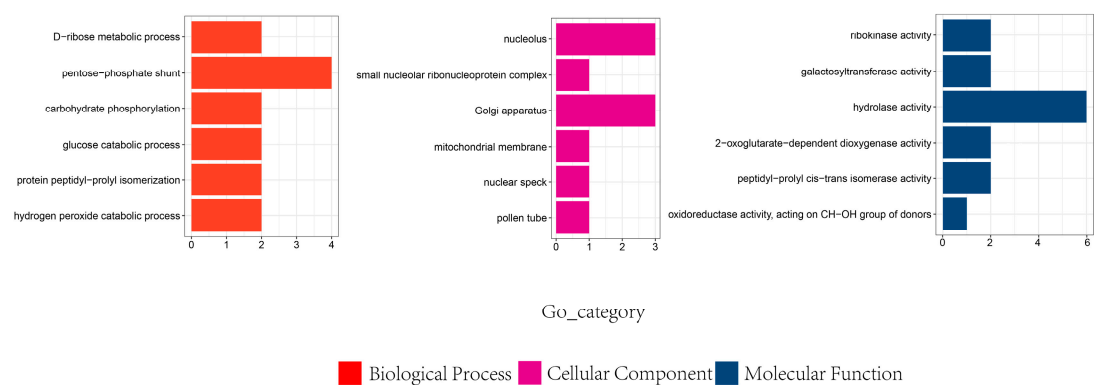

Supplementary Figure S1. The annotation of 76 genes in the 1.11Mb to 1.72Mb on chromosome 3

Supplementary Figure S2. The result of *Spo12821* DNA sequence in Sp39(rr) and Sp62(RR)
